# Supplementary material for: l-Penicillamine is a mechanism-based inhibitor of serine palmitoyltransferase by forming a pyridoxal-5′-phosphate-thiazolidine adduct
Source: Royal Society of Chemistry journal article supplement (doi:10.1039/c2md20020a), 2012-01-01
Supplement: c2md20020a.pdf [file c2md20020a.pdf]

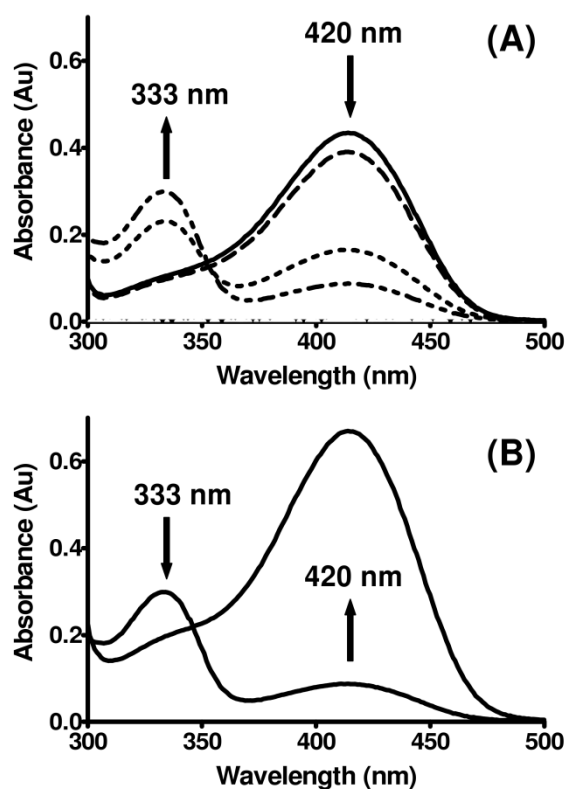

Supplementary Figure 1. Thiazolidine adduct is reversible in the presence of the primary amine Tris (A) UV-vis spectrum of 50  $\mu$ M PLP in 50 mM Tris-HCl buffer (pH 7.5) (unbroken line) and after the addition of 1 mM L-Cys at 1, 30 and 60 minute intervals (broken lines). (B) L-Cys-derived PLP:thiazolidine adduct in 50 mM Tris-HCl buffer (pH 7.5) at 60 minutes and 24 hours.
